# Supplementary material for: Metabolome analysis-based design and engineering of a metabolic pathway in Corynebacterium glutamicum to match rates of simultaneous utilization of d-glucose and l-arabinose
Source: PubMed Central journal article supplement (PMC5956887; doi:10.1186/s12934-018-0927-6), 2018-05-17
Supplement: 12934_2018_927_MOESM1_ESM.pdf [file 12934_2018_927_MOESM1_ESM.pdf]

## Supplementary materials

*Microbial Cell Factories*

Metabolome analysis-based design and engineering of a metabolic pathway in *Corynebacterium glutamicum* to match rates of simultaneous utilization of D-glucose and L-arabinose

Hideo Kawaguchi<sup>a</sup>, Kumiko Yoshihara<sup>a</sup>, Kiyotaka Y. Hara<sup>a,b</sup>, Tomohisa Hasunuma<sup>a</sup>, Chiaki Ogino<sup>c</sup>, Akihiko Kondo<sup>a,c,d,\*</sup>

<sup>a</sup> Graduate School of Science, Technology and Innovation, Kobe University, 1-1 Rokkodai, Nada, Kobe 657-8501, Japan

<sup>b</sup> Department of Environmental and Life Sciences, School of Food and Nutritional Sciences, University of Shizuoka, 52-1 Yada, Suruga, Shizuoka 422-8526, Japan

<sup>c</sup> Department of Chemical Science and Engineering, Graduate School of Engineering, Kobe University, 1-1 Rokkodai, Nada, Kobe 657-8501, Japan

<sup>d</sup> Biomass Engineering Research Division, RIKEN, 1-7-22 Suehiro, Turumi, Yokohama, Kanagawa 230-0045, Japan

**\*Correspondence:** Akihiko Kondo

Graduate School of Science, Technology and Innovation, Kobe University  
1-1 Rokkodai, Nada, Kobe 657-8501, Japan

**E-mail:** akondo@kobe-u.ac.jp

**Tel:** +81-78-803-6192

**Fax:** +81-78-803-6192

26 **Table S1** Specific growth rates and specific sugar consumption rates by recombinant strains and the wild-type strain of *C. glutamicum*  
 27 ATCC 31831

| Strain                            | Carbon source <sup>a</sup>          | Specific growth rate<br>(h <sup>-1</sup> ) | Specific consumption rate<br>(g/h/g dry cell weight) <sup>e</sup> |                    | Total amounts of sugar<br>consumed (g/L) <sup>e</sup> |
|-----------------------------------|-------------------------------------|--------------------------------------------|-------------------------------------------------------------------|--------------------|-------------------------------------------------------|
|                                   |                                     |                                            | Glucose                                                           | Arabinose          |                                                       |
| Wild-type                         | Arabinose                           | 0.36 <sup>b</sup>                          | —                                                                 | 0.180 <sup>b</sup> | 9.2 <sup>b</sup>                                      |
| Wild-type                         | Glucose                             | 0.40 <sup>b</sup>                          | 0.167 <sup>b</sup>                                                | —                  | 6.4 <sup>b</sup>                                      |
| Wild-type                         | Mixture of arabinose<br>and glucose | 0.35 <sup>b</sup>                          | 0.070 <sup>b</sup>                                                | 0.043 <sup>b</sup> | 17.3 <sup>b</sup>                                     |
| 31831/pCH <sub>pyk</sub>          | Mixture of arabinose<br>and glucose | 0.28 <sup>c</sup>                          | 0.102 <sup>c</sup>                                                | 0.050 <sup>c</sup> | 12.7 <sup>c</sup>                                     |
| $\Delta araR$                     | Mixture of arabinose<br>and glucose | 0.29 <sup>d</sup>                          | 0.101 <sup>d</sup>                                                | 0.053 <sup>d</sup> | 19.5 <sup>d</sup>                                     |
| $\Delta araR$ /pCH <sub>pyk</sub> | Mixture of arabinose<br>and glucose | 0.21 <sup>d</sup>                          | 0.081 <sup>d</sup>                                                | 0.078 <sup>d</sup> | 16.4 <sup>d</sup>                                     |

28 <sup>a</sup>BT medium containing both D-glucose and/or L-arabinose (15 g/L each) was used for aerobic cell growth.

29 <sup>b</sup>Values were determined based on data shown in Fig. 2.

30 <sup>c</sup>Values were determined based on data shown in Fig. 4.

31 <sup>d</sup>Values were determined based on data shown in Fig. 5.

32 <sup>e</sup>Values were determined from data at 23 h of cultivation.

33

34 **Table S2** Relative expression levels of genes in the *ara* cluster and central metabolic pathway in aerobically grown wild-type and *araR*-  
 35 deletion mutants with/without *pyk* overexpression ( $\Delta araR$  and  $\Delta araR/pCHpyk$ )

| Target gene <sup>d</sup> | Strain <sup>a</sup><br>Time (h) | Relative abundance <sup>b, b</sup> |                        |                        |                        |                        |                        |
|--------------------------|---------------------------------|------------------------------------|------------------------|------------------------|------------------------|------------------------|------------------------|
|                          |                                 | Wild type                          |                        | $\Delta araR$          |                        | $\Delta araR/pCHpyk$   |                        |
|                          |                                 | 11                                 | 23                     | 11                     | 23                     | 11                     | 23                     |
| <i>araA</i>              |                                 | 1.0 ± 0.26                         | 0.84 ± 0.43<br>(0.590) | 1.76 ± 0.12<br>(0.012) | 2.90 ± 0.40<br>(0.007) | 1.71 ± 0.17<br>(0.019) | 3.52 ± 0.16<br>(0.001) |
| <i>araB</i>              |                                 | 1.0 ± 0.14                         | 0.99 ± 0.48<br>(0.969) | 1.58 ± 0.11<br>(0.014) | 1.60 ± 0.46<br>(0.221) | 1.55 ± 0.34<br>(0.133) | 4.35 ± 2.04<br>(0.147) |
| <i>araE</i>              |                                 | 1.0 ± 0.25                         | 0.65 ± 0.31<br>(0.178) | 1.35 ± 0.28<br>(0.196) | 1.25 ± 0.47<br>(0.498) | 1.38 ± 0.23<br>(0.143) | 1.63 ± 0.95<br>(0.341) |
| <i>ptsG</i>              |                                 | 1.0 ± 0.31                         | 0.45 ± 0.10<br>(0.092) | 0.84 ± 0.10<br>(0.373) | 0.54 ± 0.17<br>(0.072) | 1.03 ± 0.41<br>(0.995) | 0.53 ± 0.13<br>(0.130) |
| <i>ptsI</i>              |                                 | 1.0 ± 0.06                         | 1.28 ± 0.56<br>(0.435) | 1.03 ± 0.19<br>(0.844) | 1.63 ± 0.57<br>(0.132) | 0.69 ± 0.03<br>(0.001) | 1.99 ± 1.21<br>(0.230) |
| <i>pfk</i>               |                                 | 1.0 ± 0.02                         | 0.67 ± 0.23<br>(0.078) | 0.99 ± 0.23<br>(0.961) | 1.60 ± 0.39<br>(0.058) | 1.24 ± 0.15<br>(0.051) | 0.86 ± 0.11<br>(0.098) |
| <i>gapA</i>              |                                 | 1.0 ± 0.13                         | 0.46 ± 0.37<br>(0.157) | 1.02 ± 0.17<br>(0.898) | 1.28 ± 0.58<br>(0.580) | 1.23 ± 0.13<br>(0.151) | 0.80 ± 0.01<br>(0.158) |
| <i>pyk</i>               |                                 | 1.0 ± 0.14                         | 1.03 ± 0.43<br>(0.925) | 1.25 ± 0.08<br>(0.055) | 4.13 ± 1.60<br>(0.028) | 8.16 ± 2.17<br>(0.003) | 3.64 ± 3.16<br>(0.214) |
| <i>tal</i>               |                                 | 1.0 ± 0.10                         | 0.73 ± 0.26<br>(0.171) | 1.45 ± 0.28<br>(0.060) | 2.09 ± 0.52<br>(0.025) | 1.61 ± 0.42<br>(0.059) | 2.22 ± 0.35<br>(0.009) |
| <i>tkt</i>               |                                 | 1.0 ± 0.28                         | 0.27 ± 0.11<br>(0.013) | 0.79 ± 0.21<br>(0.304) | 0.90 ± 0.01<br>(0.572) | 1.38 ± 0.59<br>(0.406) | 0.64 ± 0.29<br>(0.236) |

36 <sup>a</sup>Cells were grown aerobically to late log phase in A medium containing D-glucose and L-arabinose (20 g/L each) and subsequently  
37 inoculated to an initial OD<sub>600</sub> of 0.2 into BT medium containing both D-glucose and L-arabinose (15 g/L each).

38 <sup>b</sup>RNA was isolated from aerobically grown cells of the wild-type strain and *araR* deletion mutants with or without *pyk* overexpression  
39 harvested after 11 and 23 h of cultivation. The amount of each transcript was subsequently determined using quantitative RT-PCR and  
40 expressed relative to the amount obtained for the wild-type strain harvested after 11 h of cultivation. Data are average ± standard deviation  
41 calculated from the results of triplicate measurements.

42 <sup>c</sup>Values in parentheses indicate *p* values for comparison with the wild-type strain harvested after 11 h of cultivation.

43 <sup>d</sup>Abbreviations: *araA*, L-arabinose isomerase; *araB*, L-ribulokinase; *araE*, L-arabinose transporter; *ptsI*, enzyme I of PTS; *gapA*,  
44 glyceraldehyde-3-phosphate dehydrogenase; *pfk*, phosphofructokinase; *ptsG*, D-glucose PTS transporter; *pyk*, pyruvate kinase  
45 (NCgl2008); *tal*, transalderase; *tkt*, transketolase.

46

47

48 **Figure captions**

49

50

51 **Fig. S1** Retention time comparison of liquid chromatography–mass spectrometry/mass  
52 spectrometry total ion current chromatograms of oxaloacetate (OXA) in *C. glutamicum*  
53 cells grown aerobically in BT medium containing sugar mixture of D-glucose and L-  
54 arabinose (15 g/L each). The authentic standards of OXA at the concentration of 2, 10,  
55 and 20  $\mu\text{M}$  (a, b, c) as well as their identified counterparts in *C. glutamicum* cells of the  
56 wild-type (d), and recombinant strains of 31831/pCHpyk (e) and  $\Delta araR$ /pCHpyk (f).  
57 OXA was identified based on retention time in chromatography and its mass spectrum.  
58 Concentration of OXA was determined with peak area of its multiple reaction  
59 monitoring (MRM) transition (131.0>87.1) in LC-MS/MS.

60

61

62 **Fig. S2** Mass spectra of identified oxaloacetate (OXA) in *C. glutamicum* cells grown  
63 aerobically in BT medium containing sugar mixture of D-glucose and L-arabinose (15  
64 g/L each). The authentic standards of OXA at the concentration of 2, 10, and 20  $\mu\text{M}$  (A)  
65 as well as their identified counterparts in *C. glutamicum* cells of the wild-type (d), and  
66 recombinant strains of 31831/pCHpyk (e) and  $\Delta araR$ /pCHpyk (f). OXA was identified  
67 based on retention time in chromatography and its mass spectrum acquired by the  
68 targeted multiple reaction monitoring (MRM) transition (131.0>87.1).

69

70 Fig. S1

71

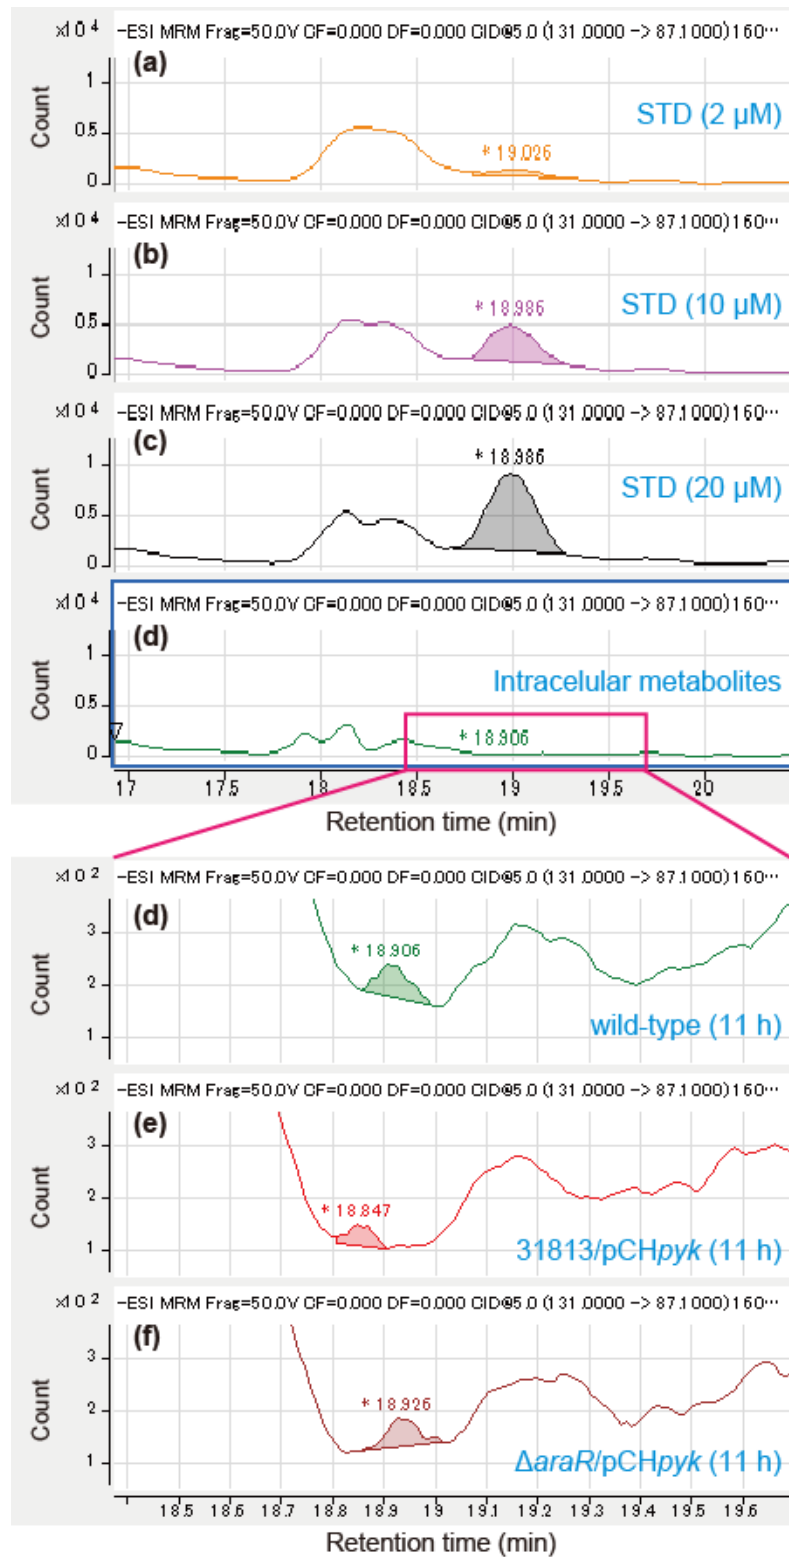

72

73 Fig. S2

74

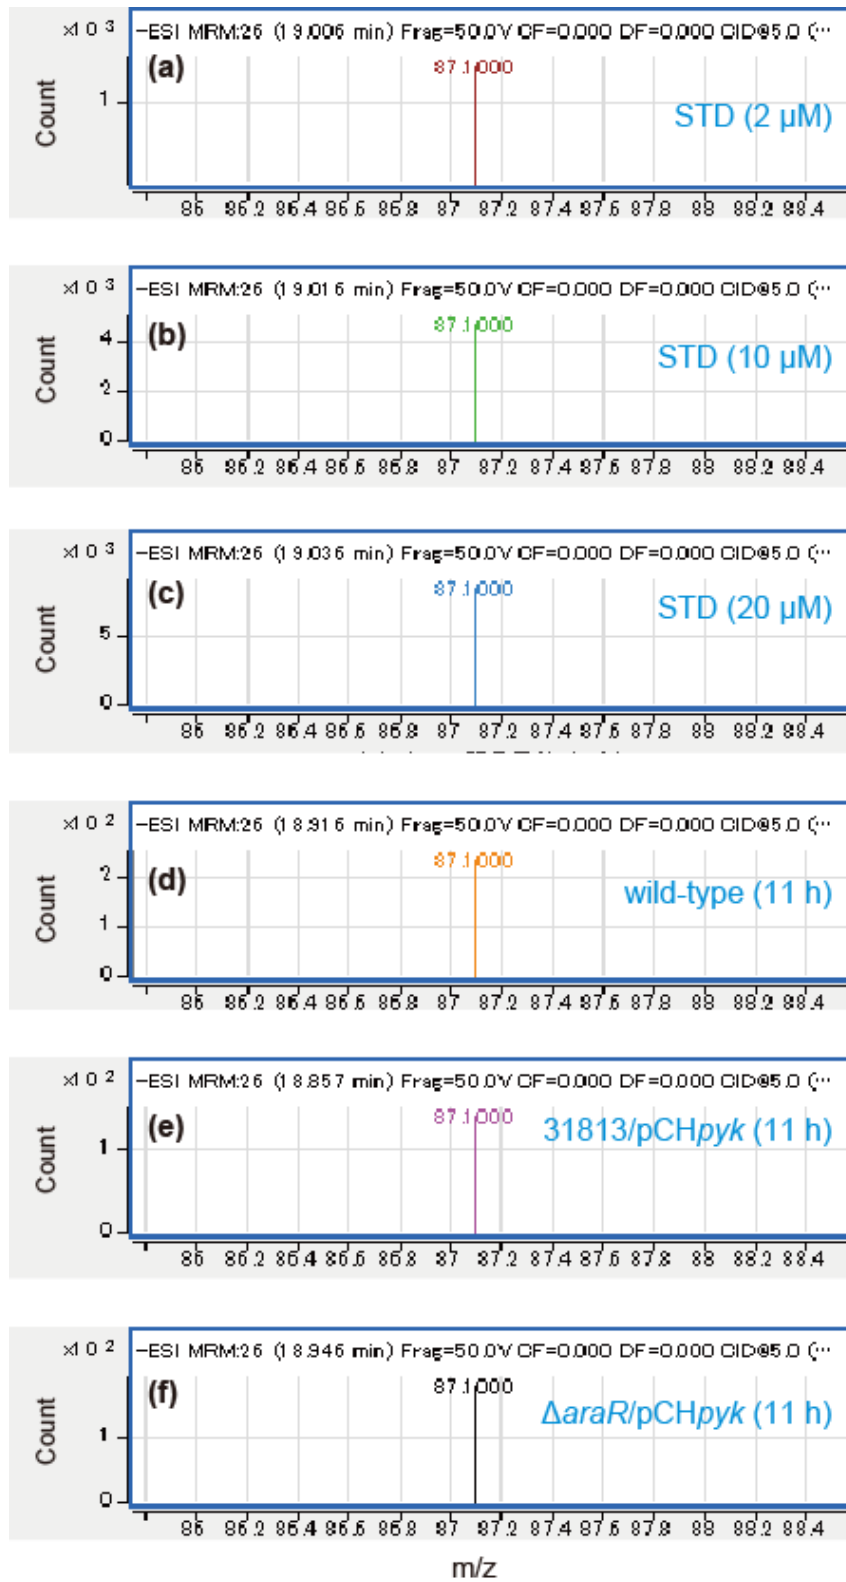

75

76 **Materials and Methods**

77

78 *Quantitative RT-PCR analysis*

79 Wild-type and recombinant ( $\Delta araR$  and  $\Delta araR/pCHpyk$ ) strains of *C. glutamicum* were  
80 grown aerobically in BT medium containing D-glucose and L-arabinose (15 g/L each).

81 Total RNA was extracted from growing cells using an RNeasy Mini kit (Qiagen, Hilden,  
82 Germany) as previous described (Kawaguchi et al., 2008). Total RNA isolated from the

83 cells was used for quantitative reverse transcriptase PCR (qPCR) analysis to determine

84 mRNA levels in wild-type and recombinant cells after 11 and 23 h of cultivation

85 compared with levels in wild-type cells after 11 h of cultivation. qPCR was performed

86 using QuantStudio 3 (Thermo Fisher Scientific, Waltham, MA) and PowerUp SYBR

87 Green Master Mix (Thermo Fisher Scientific) according to the manufacturer's

88 instructions. Oligonucleotides used for qPCR analysis are listed in [Table S3](#) (primers 13

89 through 36). The comparative cycle threshold method was used to quantify relative

90 expression. Cycle threshold values were computed by determining the average of

91 triplicate values.

92



**Table S3** Oligonucleotides used for qPCR in this study

| Name      | Target gene | Sequence (5'-3')         |
|-----------|-------------|--------------------------|
| primer 13 | <i>araA</i> | GCGCCAATGACAACGTCAT      |
| primer 14 | <i>araA</i> | TCATTAGCCTGGGTGTGAAGGT   |
| primer 15 | <i>araB</i> | TCGAACTGGATCGAGCTCTT     |
| primer 16 | <i>araB</i> | GTAGACCTCGTCGATACTGTTG   |
| primer 17 | <i>araD</i> | GATCATCGGTGACGACTCT      |
| primer 18 | <i>araD</i> | GTGGTTCTTCATCAGCACA      |
| primer 19 | <i>araE</i> | TAGCGTCCGCTGAATAGGGT     |
| primer 20 | <i>araE</i> | GCCATCGATTCCGAGCTCAA     |
| Prime r21 | <i>ptsG</i> | TATCCCATGCTCTACCCA       |
| primer 22 | <i>ptsG</i> | CCCTGAATGAAGTCGTAACC     |
| primer 23 | <i>ptsI</i> | CGAACTGTGCTTCCTTTCC      |
| primer 24 | <i>ptsI</i> | ACAACGACCTTGGACTCT       |
| primer 25 | <i>pfk</i>  | CACCGTTATTCCAGAAGTACC    |
| primer 26 | <i>pfk</i>  | GACGATAATGCCGTACTIONTCTC |
| primer 27 | <i>gapA</i> | GCAGTCAACATCGTTCCT       |
| primer 28 | <i>gapA</i> | TAAGTGAACGCGAAGTG        |
| primer 29 | <i>pyk</i>  | GGACTTTATTGCACTGTCCTTC   |
| primer 30 | <i>pyk</i>  | CTTGCGATCACAGGAACA       |
| primer 31 | <i>tal</i>  | TCCAAGATCCACTCTGTGGCTT   |
| primer 32 | <i>tal</i>  | AAAGCCTCATCGGATCCGATTG   |
| primer 33 | <i>tkl</i>  | CATCCTCAACGGCATTTCCT     |
| primer 34 | <i>tlt</i>  | CCATGAGAGCTGCAAGACGAA    |
| primer 35 | 16S rRNA    | CAGGTCTCTGGGCAGTAACTGA   |
| primer 36 | 16S rRNA    | CGTTTACGGCATGGACTACCA    |

95 **Reference**

96 Kawaguchi H, Sasaki M, Vertès AA, Inui M, Yukawa H. Engineering of an L-  
97 arabinose metabolic pathway in *Corynebacterium glutamicum*. Appl Microbiol  
98 Biotechnol. 2008;77:1053–62. doi:10.1007/s00253-007-1244-x.

99
